# Supplementary material for: Diversity and Evolution of Novel Invertebrate DNA Viruses Revealed by Meta-Transcriptomics
Source: PubMed Central journal article supplement (PMC6950620; doi:10.3390/v11121092), 2019-11-25
Supplement: viruses-11-01092-s001.pdf [file viruses-11-01092-s001.pdf]

# Supplementary Materials

**A**

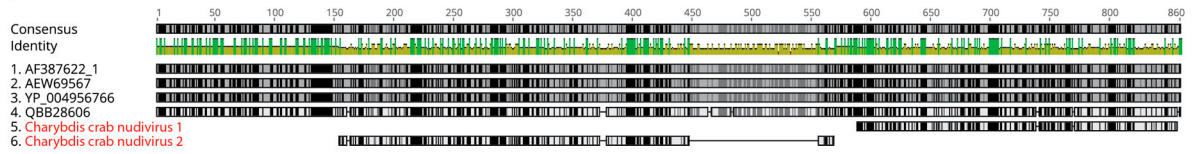

**B**

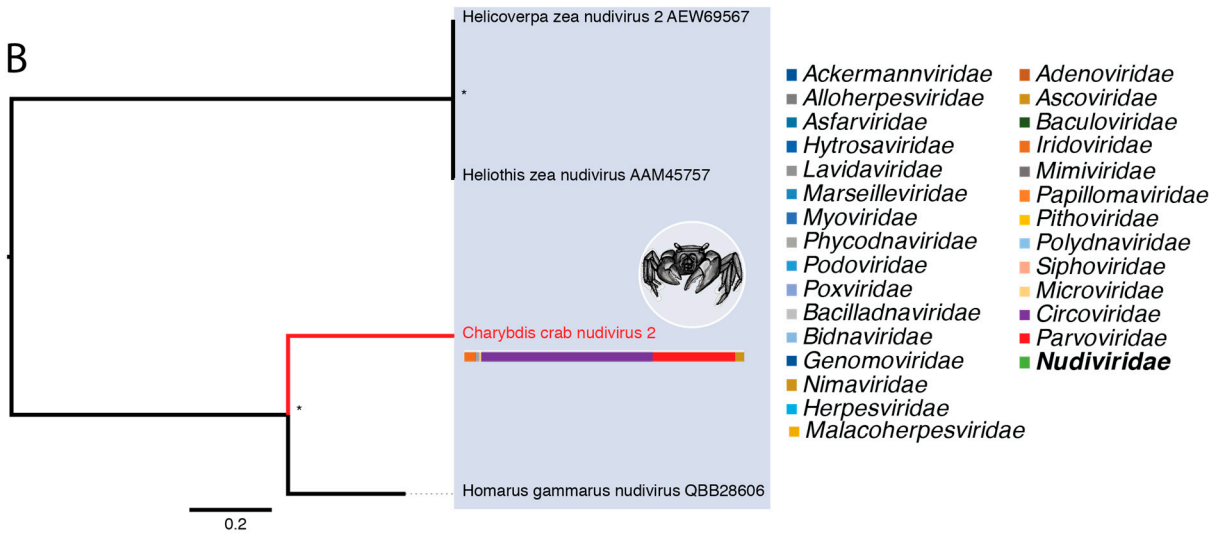

**C**

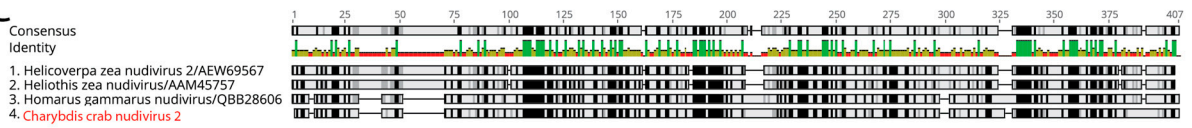

**D**

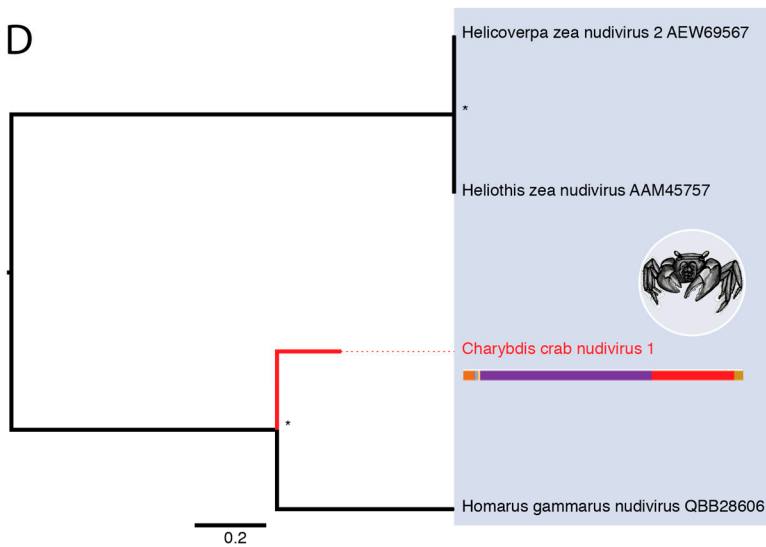

**E**

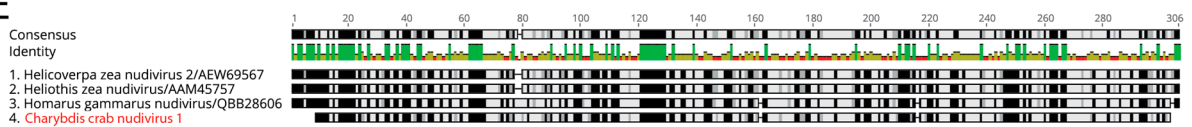

**Figure S1.** Visualising the relationships of three amino acid sequences of the highly conserved DNA polymerase protein from the *Nudiviridae*, including the two novel nudiviruses identified here. **(A)** An alignment of the two novel nudivirus sequences with three known members of the *Nudiviridae*. As the two novel sequences aligned to different regions of DNA polymerase, separate phylogenetic trees were estimated for each sequence. **(B)** The phylogenetic relationships among the nudiviruses and *Scylla nudivirus* (highlighted in red) from the BHXun library (from sesarmid crabs). **(C)** The alignment of *Scylla nudivirus* and other members of *Nudiviridae* used in the phylogenetic analysis. **(D)** The phylogenetic relationship among nudiviruses and *Charybdis nudivirus* (highlighted in red), from the BHXun library. **(E)** Alignment of *Charybdis nudivirus* and other members of *Nudiviridae* used in the phylogenetic analysis. The abundance of nudi-like contigs (in green) in the BHXun library is shown next to each novel species. Bootstrap values greater than 85% are marked by an asterisk. For clarity, the trees were mid-point rooted, with all horizontal branch lengths scaled according to the number of amino acid substitutions per site.

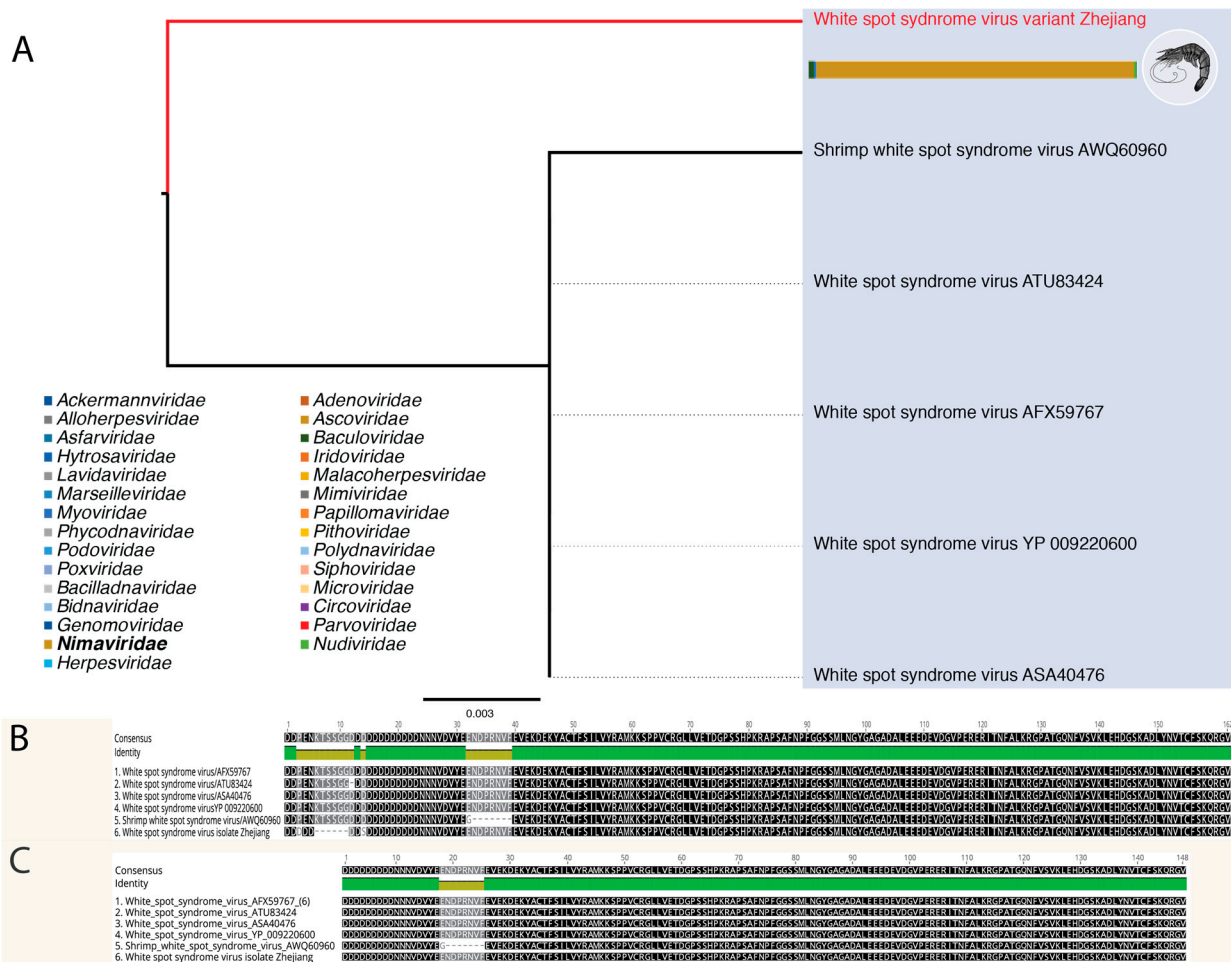

**Figure S2.** Visualising the relationships of five known amino acid sequences of the highly conserved anti-apoptosis protein from the *Nimaviridae*, including the potentially novel WSSV variant (Zhejiang) identified in this study. **(A)** Amino acid sequences of the conserved anti-apoptosis protein in the family *Nimaviridae* ( $n = 5$ ) used in an alignment with the ORF hypothesised to be WSV390 in the novel WSSV variant Zhejiang. **(B)** Phylogenetic relationships of WSSV sequences, including WSSV variant Zhejiang (in red). The abundance of nima-like contigs (yellow) in the Shrimp library is shown beside WSSV variant Zhejiang. Only bootstrap values greater than 85% are shown. All horizontal branch lengths are scaled according to the number of amino acid substitutions per site and the tree was mid-point rooted for clarity.

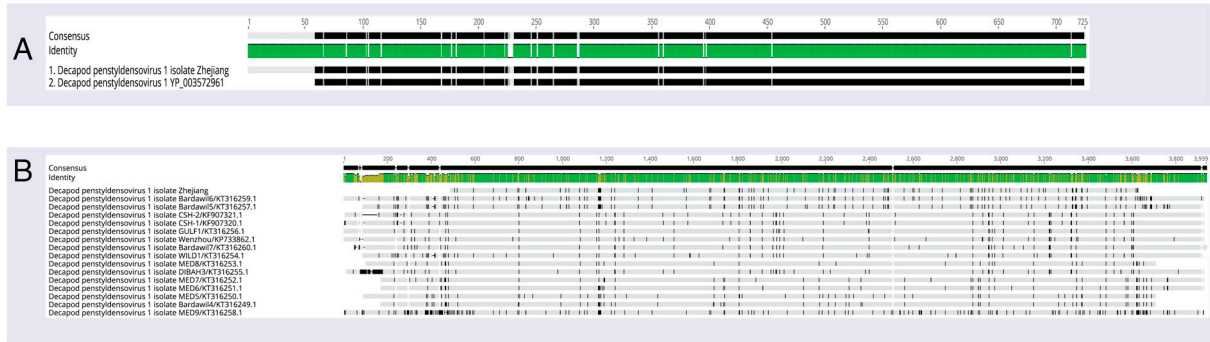

**Figure S3.** Visualisation of the amino acid and nucleotide level similarity of novel Decapod penstyldensovirus 1 variant Zhejiang with other sequences of the same species. **(A)** Amino acid alignment of the NS1 protein of novel Decapod penstyldensovirus 1 variant Zhejiang with Decapod penstyldensovirus 1. **(B)** Nucleotide alignment of the whole genome of Decapod penstyldensovirus 1 variant Zhejiang and other members of the same species (n = 15).

**Table S1.** Additional libraries included in this study.

| <b>Name</b> | <b>Library</b>                         | <b>Host</b>               | <b>Habitat</b> | <b>Library accession</b> |
|-------------|----------------------------------------|---------------------------|----------------|--------------------------|
| YC          | Plasmodium mix                         | <i>Plasmodium berghei</i> | Hubei          |                          |
| WZGZ        | Maxillopoda mix                        | Maxillopoda               | Wenzhou        | SRR10012027              |
| CPQYII      | Earthworm mix<br>Changping II          | Oligochaeta               | Beijing        |                          |
| BZLII       | Turritella sea snails<br>mix Beihai II | Turritella                | Beihai         |                          |
| BHRJ        | Beihai arthropod mix                   | Arthropoda                | Beihai         |                          |

**Table S2.** The amino acid substitution models employed in the phylogenetic analysis performed here.

| <b>Virus family</b>        | <b>Model</b> | <b><math>\Gamma</math></b> | <b>I</b> | <b>F</b> |
|----------------------------|--------------|----------------------------|----------|----------|
| <i>Circoviridae</i>        | RtRev        | x                          |          | x        |
| <i>Parvoviridae</i>        | RtRev        | x                          |          | x        |
| <i>Gemycircularviridae</i> | RtRev        | x                          | x        | x        |
| <i>Nimaviridae</i>         | RtRev        |                            |          | x        |
| <i>Polyoviridae</i>        | LG           | x                          | x        | x        |
| <i>Nudiviridae</i>         | RtRev        | x                          |          | x        |
| <i>Herpesviridae</i>       | LG           | x                          | x        |          |
